# Supplementary material for: Characterization of Key Aroma Compounds and Main Contributing Amino Acids in Hot-Pressed Oil Prepared from Various Peanut Varieties
Source: MDPI journal article supplement (doi:10.3390/molecules29091947), 2024-04-24
Supplement: s1 [file s1]

Table S1. Composition and relative content of volatile components in normal- and high-oleic peanut oil samples (mg/kg).

| Number | CAS       | Category  | Volatile Compound             | Content (mg/kg) |       |       |       |       |       |       |       |       |
|--------|-----------|-----------|-------------------------------|-----------------|-------|-------|-------|-------|-------|-------|-------|-------|
|        |           |           |                               | ZLP1            | ZLP2  | ZLP3  | ZLP4  | ZLP5  | ZLP6  | ZLP7  | ZLP8  | ZLP9  |
| 1      | 74-93-1   | Alcohols  | Methyl mercaptan              | 0.261           | 0.192 | 0.189 | 0.195 | 0.153 | 0.186 | 0.105 | 0.12  | 0.108 |
| 2      | 71-41-0   |           | 1-Pentanol                    | 0.519           | 0.372 | 0     | 0.426 | 0     | 0.405 | 0     | 0.306 | 0     |
| 3      | 111-27-3  |           | Hexanol                       | 0.882           | 1.125 | 0.321 | 1.428 | 1.392 | 1.521 | 0.387 | 1.554 | 1.131 |
| 4      | 3391-86-4 |           | 1-Octen-3-ol                  | 0.213           | 0.345 | 0.189 | 0.084 | 0.327 | 0.201 | 0.234 | 0.186 | 0.36  |
| 5      | 111-87-5  |           | Octanol                       | 0               | 0     | 0     | 0     | 0.156 | 0.204 | 0     | 0.186 | 0.327 |
| 6      | 98-00-0   |           | Furfuryl alcohol              | 0.885           | 0.594 | 0.633 | 0.441 | 0.786 | 0.552 | 0.564 | 0.507 | 0.57  |
| 7      | 143-08-8  |           | 1-Nonanol                     | 0               | 0     | 0     | 0.075 | 0.069 | 0.075 | 0.036 | 0.129 | 0     |
| 8      | 100-51-6  |           | Benzyl alcohol                | 0               | 0     | 0     | 0     | 0     | 0     | 0.045 | 0     | 0.075 |
| 9      | 1960/12/8 |           | Phenylethanol                 | 0               | 0     | 0.075 | 0.087 | 0.099 | 0.216 | 0.066 | 0.297 | 0.168 |
| 10     | 90-00-6   | Phenolics | 2-Ethylphenol                 | 0               | 0     | 0     | 0.009 | 0.015 | 0     | 0     | 0     | 0.012 |
| 11     | 7786-61-0 |           | 4-Hydroxy-3-methoxystyrene    | 0.261           | 0.297 | 0.372 | 0.309 | 0.555 | 0.78  | 0.594 | 0.867 | 0.759 |
| 12     | 140-29-4  | Others    | Benzyl cyanide                | 0               | 0     | 0     | 0     | 0.018 | 0     | 0     | 0     | 0     |
| 13     | 75-50-3   |           | Trimethylamine                | 0               | 0     | 0.057 | 0     | 0.051 | 0.039 | 0.117 | 0.117 | 0.192 |
| 14     | 75-18-3   |           | Dimethyl sulfide              | 0               | 0     | 0     | 0.171 | 0     | 0     | 0     | 0     | 0     |
| 15     | 624-92-0  |           | Dimethyl disulfide            | 0.135           | 0.069 | 0.066 | 0.069 | 0.078 | 0.096 | 0.033 | 0.033 | 0.021 |
| 16     | 3658-80-8 |           | Dimethyl trisulfide           | 0.036           | 0.024 | 0.045 | 0.039 | 0.03  | 0.06  | 0     | 0.015 | 0     |
| 17     | 67-68-5   |           | Dimethyl sulfoxide            | 0               | 0     | 0.078 | 0.255 | 0     | 0     | 0     | 0     | 0     |
| 18     | 4030-22-2 |           | 3,4-Dimethyl-3-pyrrolin-2-one | 0               | 0.027 | 0.018 | 0.012 | 0.042 | 0     | 0.036 | 0     | 0     |
| 19     | 123-38-6  | Aldehydes | Propionaldehyde               | 0               | 0     | 0     | 0     | 0.006 | 0     | 0.009 | 0     | 0     |
| 20     | 96-17-3   |           | 2-Methylbutyraldehyde         | 0.78            | 0.477 | 0.579 | 0.435 | 0.576 | 0.543 | 0.612 | 0.357 | 0.381 |
| 21     | 590-86-3  |           | Isovaleraldehyde              | 0.492           | 0.234 | 0.297 | 0.192 | 0.255 | 0     | 0     | 0.135 | 0.18  |
| 22     | 110-62-3  |           | Glutaraldehyde                | 0.291           | 0.219 | 0.126 | 0.12  | 0.162 | 0.123 | 0.111 | 0.099 | 0.156 |

|    |            |       |                                           |       |       |       |       |       |       |       |       |       |
|----|------------|-------|-------------------------------------------|-------|-------|-------|-------|-------|-------|-------|-------|-------|
| 23 | 66-25-1    |       | Hexanal                                   | 1.263 | 1.314 | 0.666 | 0.585 | 1.026 | 0.885 | 0.603 | 0.819 | 0.945 |
| 24 | 623-36-9   |       | 2-Methyl-2-pentenal                       | 0     | 0     | 0     | 0     | 0     | 0     | 0.018 | 0     | 0     |
| 25 | 111-71-7   |       | Heptanaldehyde                            | 0     | 0     | 0     | 0     | 0     | 0     | 0     | 0.303 | 0.462 |
| 26 | 6728-26-3  |       | 2-hexenal                                 | 0.084 | 0.12  | 0.045 | 0.03  | 0.126 | 0.099 | 0.051 | 0.048 | 0.123 |
| 27 | 124-13-0   |       | Octanal                                   | 0.099 | 0.297 | 0.168 | 0.3   | 0.342 | 0.3   | 0.279 | 0.339 | 0.783 |
| 28 | 124-19-6   |       | Nonanal                                   | 0     | 0     | 0     | 0     | 0     | 0     | 0     | 0     | 1.293 |
| 29 | 36431-60-4 |       | 1-Cyclopentene-1-carboxaldehyde, 5-ethyl- | 0.105 | 0.18  | 0.111 | 0     | 0.207 | 0.162 | 0.114 | 0.099 | 0.219 |
| 30 | 1998/1/1   |       | furfural                                  | 1.635 | 1.545 | 1.311 | 0.915 | 1.62  | 1.056 | 0.966 | 0.906 | 1.023 |
| 31 | 112-31-2   |       | Decanal                                   | 0     | 0     | 0     | 0     | 0.057 | 0.048 | 0     | 0     | 0.036 |
| 32 | 100-52-7   |       | Benza                                     | 0.564 | 0.183 | 0.276 | 0.282 | 0.42  | 0.72  | 0.747 | 0.513 | 0.525 |
| 33 | 18829-56-6 |       | Trans-2-nonanal                           | 0.03  | 0.051 | 0.036 | 0.021 | 0.063 | 0.057 | 0.063 | 0.042 | 0.117 |
| 34 | 93-53-8    |       | 2-phenylpropionaldehyde                   | 0.036 | 0.036 | 0     | 0     | 0     | 0.054 | 0.06  | 0     | 0     |
| 35 | 122-78-1   |       | Phenylacetaldehyde                        | 0.876 | 0.702 | 0.339 | 0.495 | 0.471 | 1.173 | 1.128 | 1.095 | 0.783 |
| 36 | 529-20-4   |       | 2-methylbenzaldehyde                      | 0     | 0     | 0     | 0     | 0     | 0     | 0     | 0.384 | 0     |
| 37 | 3913-81-3  |       | Trans-2-decenylaldehyde                   | 0     | 0     | 0     | 0     | 0     | 0     | 0     | 0     | 0.639 |
| 38 | 2463-77-6  |       | 2-undecanonal Trans-2,4-decadienal        | 0.036 | 0.087 | 0.051 | 0.069 | 0.108 | 0.108 | 0.09  | 0.126 | 0.24  |
| 39 | 2363-88-4  |       | 2,4-decadienal                            | 0.033 | 0.063 | 0.018 | 0     | 0.117 | 0.102 | 0     | 0     | 0.168 |
| 40 | 25152-84-5 |       | trans,trans-2,4-Decadien-1-al             | 0.108 | 0.228 | 0.102 | 0.099 | 0.399 | 0.381 | 0.3   | 0.195 | 0.591 |
| 41 | 4411-89-6  |       | (2Z)-2-Phenyl-2-butenal                   | 0.141 | 0.114 | 0.048 | 0.054 | 0.105 | 0.342 | 0.219 | 0.231 | 0.177 |
| 42 | 64-19-7    | Acids | acetic acid                               | 1.377 | 0.849 | 0.825 | 0.504 | 1.188 | 0.465 | 0     | 0.483 | 0.348 |
| 43 | 541-47-9   |       | 3,3-Dimethylacrylic acid                  | 0.06  | 0.039 | 0.018 | 0.045 | 0     | 0     | 0.105 | 0     | 0     |
| 44 | 142-62-1   |       | Caproic acid                              | 0.321 | 0.456 | 0.318 | 0.471 | 1.002 | 1.326 | 0.399 | 0.996 | 0.972 |
| 45 | 124-07-2   |       | Octanoic acid                             | 0.051 | 0.093 | 0.09  | 0.078 | 0.108 | 0.21  | 0.051 | 0.219 | 0.249 |
| 46 | 112-05-0   |       | Nonanoic acid                             | 0.138 | 0.174 | 0.105 | 0.21  | 0.123 | 0.252 | 0.366 | 0.33  | 0.285 |
| 47 | 334-48-5   |       | Capric acid                               | 0     | 0     | 0     | 0     | 0     | 0.015 | 0     | 0     | 0     |

|    |            |         |                                                  |       |       |       |       |       |       |       |       |       |
|----|------------|---------|--------------------------------------------------|-------|-------|-------|-------|-------|-------|-------|-------|-------|
| 48 | 109-66-0   | Alkanes | Pentane                                          | 0     | 0     | 0     | 0.006 | 0     | 0.042 | 0.021 | 0     | 0     |
| 49 | 110-54-3   |         | hexane                                           | 0     | 0     | 0.126 | 0.33  | 0     | 0.084 | 0     | 0     | 0     |
| 50 | 142-82-5   |         | Heptane                                          | 0.267 | 0.18  | 0.135 | 0.126 | 0.147 | 0.093 | 0.048 | 0.093 | 0.147 |
| 51 | 111-65-9   |         | octane                                           | 0.357 | 0.429 | 0.21  | 0.21  | 0.255 | 0.192 | 0.111 | 0.126 | 0.306 |
| 52 | 108-88-3   |         | toluene                                          | 0.321 | 0.204 | 0     | 0     | 0     | 0.174 | 0.165 | 0     | 0     |
| 53 | 1632-71-9  |         | Nonane, 4-ethyl-5-methyl-                        | 0     | 0     | 0     | 0     | 0     | 0     | 0.045 | 0.06  | 0     |
| 54 | 17302-23-7 |         | Dimethylnonane, 2,6-                             | 0     | 0.018 | 0.003 | 0     | 0     | 0.003 | 0     | 0     | 0     |
| 55 | 100-41-4   |         | Ethyl benzene                                    | 0     | 0     | 0     | 0     | 0     | 0     | 0     | 0     | 0.003 |
| 56 | 108-38-3   |         | M-xylene                                         | 0     | 0     | 0     | 0.006 | 0     | 0.003 | 0     | 0     | 0     |
| 57 | 112-40-3   |         | Dodecane                                         | 0     | 0     | 0     | 0     | 0     | 0     | 0.027 | 0     | 0     |
| 58 | 2815-58-9  |         | Cyclopentane, 1,2,4-trimethyl-                   | 0     | 0     | 0.228 | 0     | 0.468 | 0     | 0.291 | 0     | 0.414 |
| 59 | 629-50-5   |         | Tridecane                                        | 0     | 0     | 0.069 | 0     | 0     | 0     | 0.225 | 0.21  | 0     |
| 60 | 629-59-4   |         | Tetradecane                                      | 0.033 | 0.075 | 0.039 | 0.03  | 0.057 | 0.054 | 0     | 0.114 | 0.096 |
| 61 | 600-14-6   | Ketones | 2,3-pentanedione                                 | 0.201 | 0.096 | 0.078 | 0.087 | 0.054 | 0.045 | 0.054 | 0.066 | 0.027 |
| 62 | 110-43-0   |         | 2-heptanone                                      | 0     | 0     | 0     | 0     | 0.099 | 0.075 | 0     | 0.108 | 0.117 |
| 63 | 513-86-0   |         | 3-hydroxy-2-oxobutane                            | 0.159 | 0.06  | 0.078 | 0.105 | 0.054 | 0.045 | 0.042 | 0.06  | 0.051 |
| 64 | 111-13-7   |         | Zhongoctanone                                    | 0     | 0     | 0     | 0     | 0.06  | 0.078 | 0     | 0.042 | 0.075 |
| 65 | 116-09-6   |         | Hydroxyacetone                                   | 0.051 | 0     | 0     | 0     | 0     | 0     | 0     | 0     | 0     |
| 66 | 5704-20-1  |         | 2-hydroxy-3-pentanone                            | 0.153 | 0.081 | 0.063 | 0.054 | 0.06  | 0.039 | 0.051 | 0.042 | 0.042 |
| 67 | 5077-67-8  |         | 1-hydroxy-2-butanone                             | 0.036 | 0     | 0     | 0     | 0     | 0     | 0     | 0     | 0     |
| 68 | 18402-83-0 |         | 3-nonene-2-one                                   | 0     | 0     | 0     | 0     | 0.042 | 0.033 | 0     | 0     | 0.066 |
| 69 | 765-70-8   |         | 3-Methyl-1,2-cyclopentanedione                   | 0.132 | 0     | 0     | 0.084 | 0     | 0.12  | 0.09  | 0.159 | 0.153 |
| 70 | 80-71-7    |         | Methyl cyclopentenolone                          | 0     | 0.117 | 0.132 | 0     | 0.189 | 0     | 0     | 0     | 0     |
| 71 | 3393-45-1  |         | 5,6-DIHYDRO-2H-PYRAN-2-ONE                       | 0     | 0     | 0     | 0     | 0     | 0.009 | 0     | 0     | 0     |
| 72 | 6124-79-4  |         | 4-METHYL-2(5H)-FURANONE                          | 0     | 0     | 0.021 | 0.012 | 0     | 0     | 0     | 0     | 0     |
| 73 | 599-04-2   |         | 2(3H)-Furanone, dihydro-3-hydroxy-4,4-dimethyl-, | 0     | 0     | 0.261 | 0     | 0     | 0.201 | 0     | 0     | 0     |

|    |            |               |                                    |       |       |       |       |       |       |       |       |       |
|----|------------|---------------|------------------------------------|-------|-------|-------|-------|-------|-------|-------|-------|-------|
| 74 | 96-54-8    | Heterocyclics | N-Methyl pyrrole                   | 4.005 | 1.551 | 0.42  | 0.558 | 0.849 | 0.267 | 0.585 | 0.534 | 0.507 |
| 75 | 289-95-2   |               | pyrimidine                         | 0.186 | 0     | 0     | 0     | 0     | 0     | 0     | 0     | 0     |
| 76 | 290-37-9   |               | Pyrazine                           | 0     | 0.087 | 0     | 0.096 | 0     | 0.054 | 0.057 | 0     | 0.066 |
| 77 | 108-99-6   |               | 3-methylpyridine                   | 0     | 0     | 0.033 | 0     | 0     | 0.033 | 0.036 | 0.024 | 0.042 |
| 78 | 3777-69-3  |               | 2-Pentylfuran                      | 0.366 | 0.696 | 0.426 | 0.471 | 1.149 | 0.834 | 0.504 | 0.456 | 1.41  |
| 79 | 109-08-0   |               | 2-methylpyrazine                   | 4.812 | 3.195 | 2.13  | 2.511 | 3.372 | 2.436 | 3.039 | 2.238 | 2.316 |
| 80 | 123-32-0   |               | 2,5-Dimethyl pyrazine              | 0     | 4.563 | 2.952 | 3.513 | 5.028 | 4.311 | 4.857 | 4.131 | 4.191 |
| 81 | 108-50-9   |               | 2,6-Dimethyl pyrazine              | 1.179 | 1.092 | 0.669 | 0.69  | 1.287 | 0.864 | 1.185 | 0.84  | 0.96  |
| 82 | 13925-00-3 |               | 2-Ethylpyrazine                    | 1.191 | 0.984 | 0.648 | 0.753 | 1.023 | 0.678 | 0.876 | 0.663 | 0.723 |
| 83 | 5910-89-4  |               | 2,3-Dimethylpyrazine               | 0.501 | 0.432 | 0.225 | 0.249 | 0.408 | 0.264 | 0.414 | 0.282 | 0.327 |
| 84 | 536-78-7   |               | 3-ethylpyridine                    | 0     | 0.015 | 0     | 0     | 0.009 | 0     | 0     | 0     | 0.033 |
| 85 | 13925-03-6 |               | 2-ethyl-6-methylpyrazine           | 0.939 | 1.092 | 0.702 | 0.621 | 1.377 | 0.732 | 1.239 | 0.666 | 0.903 |
| 86 | 13360-64-0 |               | 2-ethyl-5-methylpyrazin            | 2.079 | 2.616 | 1.779 | 2.064 | 3.246 | 2.559 | 2.922 | 2.208 | 1.836 |
| 87 | 14667-55-1 |               | 2,3,5-Trimethylpyrazine            | 1.506 | 0     | 0     | 0.972 | 0     | 1.335 | 1.983 | 1.266 | 1.542 |
| 88 | 3430-33-9  |               | 3-AMINO-2,6-DIMETHYLPYRIDINE       | 0     | 1.716 | 0.999 | 0     | 1.98  | 0     | 0     | 0     | 0     |
| 89 | 18138-03-9 |               | 2-propylpyrazine                   | 0     | 0     | 0     | 0.003 | 0     | 0.006 | 0     | 0     | 0     |
| 90 | 13925-07-0 |               | 3,5-Dimethyl-2-ethylpyrazine       | 0     | 0     | 0.117 | 0.111 | 0.198 | 0.126 | 0.183 | 0.09  | 0.165 |
| 91 | 13067-27-1 |               | 3-Ethyl-2,5-diMethylpyrazine       | 0.096 | 0.123 | 0     | 0     | 0     | 0     | 0     | 0     | 0     |
| 92 | 13360-65-1 |               | 3-Ethyl-2,5-diMethylpyrazine       | 0     | 2.67  | 2.04  | 0     | 2.742 | 1.965 | 2.502 | 1.941 | 2.418 |
| 93 | 15707-34-3 |               | 2,3-Dimethyl-5-ethylpyrazine       | 0.528 | 0.807 | 0.507 | 0.507 | 0.774 | 0.552 | 0.699 | 0.567 | 0.795 |
| 94 | 13925-09-2 |               | Pyrazine, 2-ethenyl-6-methyl-      | 0.114 | 0.132 | 0.087 | 0.069 | 0.186 | 0.123 | 0.15  | 0.102 | 0.153 |
| 95 | 18138-05-1 |               | Pyrazine, 3,5-diethyl-2-methyl-    | 0.342 | 0.174 | 0.375 | 0.267 | 0.426 | 0.285 | 0.411 | 0.255 | 0.366 |
| 96 | 1192-62-7  |               | 2-Acetylfuran                      | 0.159 | 0.501 | 0.174 | 0.066 | 0.204 | 0.132 | 0.156 | 0.117 | 0.108 |
| 97 | 55138-63-1 |               | Pyrazine, 2-methyl-5-(2-propenyl)- | 0     | 0.171 | 0.114 | 0     | 0.162 | 0     | 0.279 | 0.15  | 0.201 |
| 98 | 636-41-9   |               | 2-Methylpyrrole                    | 0     | 0.039 | 0     | 0     | 0.033 | 0     | 0.084 | 0     | 0     |
| 99 | 620-02-0   |               | 5-Methyl furfural                  | 0.144 | 0.147 | 0.171 | 0.099 | 0.228 | 0.156 | 0.123 | 0.12  | 0.165 |

|     |            |        |                                                     |       |       |       |       |       |       |       |       |       |
|-----|------------|--------|-----------------------------------------------------|-------|-------|-------|-------|-------|-------|-------|-------|-------|
| 100 | 616-43-3   |        | 1H-Pyrrole, 3-methyl-                               | 0.123 | 0.087 | 0     | 0     | 0.087 | 0.036 | 0.141 | 0.06  | 0.057 |
| 101 | 2294-76-0  |        | 2-pentylpyridine                                    | 0     | 0.042 | 0     | 0     | 0     | 0.084 | 0     | 0     | 0.189 |
| 102 | 7295-76-3  |        | 3-methoxypyridine                                   | 0     | 0.12  | 0.351 | 0.186 | 0     | 0     | 0.201 | 0     | 0     |
| 103 | 1192-58-1  |        | N-methyl-2-pyrrolaldehyde                           | 0.039 | 0.027 | 0.024 | 0.027 | 0.045 | 0.024 | 0.045 | 0.027 | 0     |
| 104 | 872-50-4   |        | N-methylpyrrolidone                                 | 0.063 | 0     | 0.12  | 0.111 | 0     | 0.075 | 0.126 | 0.093 | 0     |
| 105 | 18217-82-8 |        | 2-Methyl-5-[(E)-1-propenyl]pyrazine                 | 0     | 0     | 0.075 | 0.069 | 0.153 | 0.126 | 0.219 | 0     | 0.159 |
| 106 | 67402-83-9 |        | 1-Acetyl-1,4-dihydropyridine                        | 0.117 | 0.099 | 0.105 | 0.102 | 0     | 0     | 0     | 0     | 0     |
| 107 | 497-23-4   |        | 2(5H)-Furanone                                      | 0.519 | 0.414 | 0.3   | 0.282 | 0.507 | 0.477 | 0.345 | 0.468 | 0.318 |
| 108 | 4030-18-6  |        | 1-acetylpyrrolidine                                 | 0     | 0.009 | 0.006 | 0     | 0.015 | 0.015 | 0     | 0     | 0.021 |
| 109 | 118-71-8   |        | Methyl Maltol                                       | 0.369 | 0.3   | 0.453 | 0.45  | 0.384 | 0.531 | 0.36  | 0.627 | 0.426 |
| 110 | 1072-83-9  |        | 2-acetylpyrrole                                     | 0.21  | 0.18  | 0.225 | 0.189 | 0.312 | 0.324 | 0.264 | 0.291 | 0.312 |
| 111 | 1003-29-8  |        | 2-pyrrolaldehyde                                    | 0.18  | 0.165 | 0.102 | 0.096 | 0.195 | 0.21  | 0.171 | 0.231 | 0.219 |
| 112 | 616-45-5   |        | 2-pyrrolidone                                       | 0.231 | 0.222 | 0.27  | 0.219 | 0.264 | 0.24  | 0.117 | 0.228 | 0.33  |
| 113 | 3658-77-3  |        | Furanone                                            | 0.537 | 0.402 | 0.315 | 0.327 | 0.468 | 0.444 | 0.456 | 0.585 | 0.39  |
| 114 | 3470-98-2  |        | 1-Butylpyrrolidin-2-one                             | 0     | 0     | 0.039 | 0     | 0     | 0     | 0     | 0     | 0.051 |
| 115 | 28564-83-2 |        | 2,3-Dihydro-3,5-dihydroxy-6-methyl-4(H)-pyran-4-one | 0.465 | 0.402 | 0.477 | 0.387 | 0.594 | 0.555 | 0     | 0.744 | 0.645 |
| 116 | 137-00-8   |        | 5-(2-Hydroxyethyl)-4-methylthiazole                 | 0.102 | 0.081 | 0.132 | 0.156 | 0.102 | 0.216 | 0.12  | 0.21  | 0.126 |
| 117 | 496-16-2   |        | 2,3-Dihydrobenzofuran                               | 1.62  | 1.467 | 1.899 | 1.485 | 1.902 | 3.087 | 2.7   | 2.112 | 2.058 |
| 118 | 67-47-0    |        | 5-Hydroxymethylfurfural                             | 0.048 | 0.039 | 0.072 | 0     | 0.072 | 0.102 | 0     | 0.063 | 0.051 |
| 119 | 79-20-9    | Esters | Methyl acetate                                      | 0     | 0     | 0     | 0.072 | 0.054 | 0.042 | 0     | 0.018 | 0     |
| 120 | 1679-47-6  |        | alpha-Methylbutyrolactone                           | 0.075 | 0     | 0.09  | 0.075 | 0     | 0     | 0     | 0.093 | 0     |
| 121 | 591-81-1   |        | 4-Hydroxybutyric acid                               | 0     | 0     | 0     | 0     | 0     | 0     | 0.174 | 0     | 0     |
| 122 | 96-48-0    |        | Gamma Butyrolactone                                 | 0.288 | 0.261 | 0.252 | 0.24  | 0.306 | 0.186 | 0     | 0.225 | 0.309 |
| 123 | 695-06-7   |        | gamma-Hexalactone                                   | 0     | 0     | 0     | 0     | 0     | 0.108 | 0     | 0.057 | 0.144 |
| 124 | 93-60-7    |        | Methyl nicotinate                                   | 0     | 0.015 | 0.036 | 0.039 | 0.057 | 0.051 | 0.057 | 0.072 | 0.045 |
| 125 | 104-50-7   |        | Propionolactone                                     | 0     | 0     | 0     | 0     | 0     | 0.045 | 0     | 0     | 0     |

|     |            |                    |       |       |   |       |       |   |       |      |       |
|-----|------------|--------------------|-------|-------|---|-------|-------|---|-------|------|-------|
| 126 | 13129-23-2 | Methyl 3-furanoate | 0     | 0     | 0 | 0.006 | 0.024 | 0 | 0     | 0    | 0     |
| 127 | 79-50-5    | DL-Pantolactone    | 0.276 | 0.213 | 0 | 0.309 | 0.243 | 0 | 0.207 | 0.27 | 0.237 |

Table S2. Fatty acid composition profile of different peanut oil samples (g/100 g).

|      | C14:0 | C16:0  | C16:1 | C17:0 | C18:0 | C18:1n9c | C18:2n6c | C20:0 | C20:1 | C18:3n3 | C21:0 | C20:2 | C22:0 | C22:1n9 | C23:0 | C24:0 | C20:5 |
|------|-------|--------|-------|-------|-------|----------|----------|-------|-------|---------|-------|-------|-------|---------|-------|-------|-------|
| ZLP1 | 0.04% | 10.27% | 0.06% | 0.09% | 2.14% | 43.57%   | 36.13%   | 1.21% | 1.49% | 0.09%   | 0.02% | 0.05% | 2.97% | 0.14%   | 0.04% | 1.63% | 0.06% |
| ZLP2 | 0.05% | 12.31% | 0.11% | 0.09% | 4.39% | 50.32%   | 25.08%   | 1.74% | 0.87% | 0.05%   | 0.03% | /     | 3.37% | 0.06%   | 0.05% | 1.37% | 0.12% |
| ZLP3 | 0.04% | 9.29%  | 0.09% | 0.08% | 3.35% | 54.69%   | 25.28%   | 1.48% | 1.28% | 0.09%   | /     | 0.03% | 2.61% | 0.10%   | 0.05% | 1.55% | /     |
| ZLP4 | 0.04% | 9.18%  | 0.09% | 0.08% | 3.85% | 62.56%   | 17.53%   | 1.62% | 1.02% | 0.06%   | /     | 0.03% | 2.50% | 0.07%   | 0.04% | 1.32% | /     |
| ZLP5 | 0.05% | 12.31% | 0.11% | 0.09% | 4.39% | 50.32%   | 25.08%   | 1.74% | 0.87% | 0.05%   | 0.03% | /     | 3.37% | 0.06%   | 0.05% | 1.37% | 0.12% |
| ZLP6 | 0.05% | 11.08% | 0.05% | 0.08% | 5.54% | 41.55%   | 34.30%   | 2.04% | 0.69% | 0.07%   | 0.03% | 0.03% | 3.18% | 0.05%   | 0.05% | 1.16% | 0.04% |
| ZLP7 | 0.04% | 10.17% | 0.05% | 0.08% | 5.79% | 42.18%   | 35.13%   | 2.08% | 0.63% | 0.06%   | 0.02% | 0.02% | 2.64% | 0.04%   | 0.04% | 1.02% | /     |
| ZLP8 | 0.05% | 9.97%  | 0.07% | 0.11% | 3.14% | 55.14%   | 24.04%   | 1.48% | 1.15% | 0.07%   | 0.03% | /     | 3.11% | 0.09%   | 0.04% | 1.46% | 0.05% |
| ZLP9 | 0.04% | 9.55%  | 0.07% | 0.09% | 2.91% | 53.89%   | 26.04%   | 1.40% | 1.29% | 0.08%   | /     | 0.03% | 2.97% | 0.11%   | 0.05% | 1.46% | /     |
